# Supplementary material for: Magnetic Properties of SmCo5 + 10 wt% Fe Exchange-Coupled Nanocomposites Produced from Recycled SmCo5
Source: Nanomaterials (Basel). 2020 Jul 3;10(7):1308. doi: 10.3390/nano10071308 (PMC7407525; doi:10.3390/nano10071308)

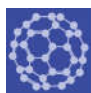

Supplementary Information

# Magnetic Properties of $\text{SmCo}_5 + 10 \text{ wt\% Fe}$ Exchange-Coupled Nanocomposites Produced from Recycled $\text{SmCo}_5$

Arnab Chakraborty <sup>1,2</sup>, Răzvan Hirian <sup>3,\*</sup>, Gregor Kapun <sup>4</sup> and Viorel Pop <sup>3</sup>

<sup>1</sup> Research and Development, MAGNETI Ljubljana d.d., 1000 Ljubljana, Slovenia; arnab.chakraborty@etn-demeter.eu

<sup>2</sup> Jožef Stefan International Postgraduate School, 1000 Ljubljana, Slovenia

<sup>3</sup> Faculty of Physics, Babeş-Bolyai University, 400084 Cluj-Napoca, Romania; viorel.pop@phys.ubbcluj.ro

<sup>4</sup> Department for Material Chemistry, National Institute of Chemistry, 1000 Ljubljana, Slovenia; Gregor.Kapun@ki.si

\* Correspondence: Razvan.HIRIAN@ubbonline.ubbcluj.ro

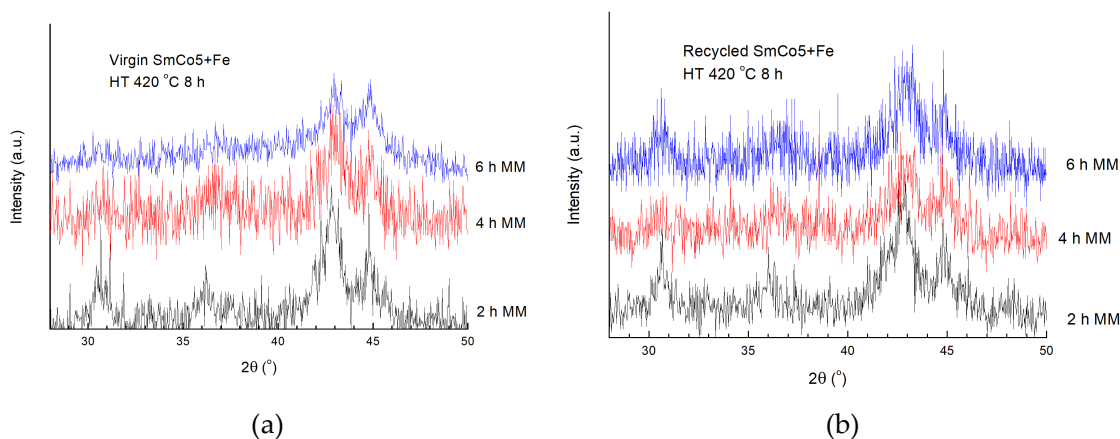

**Figure S1.** XRD patterns for  $\text{SmCo}_5 + 10 \text{ wt\% Fe}$  magnetic nanocomposite, made using (a) virgin or (b) recycled  $\text{SmCo}_5$ , milled for 2, 4 and 6 h and annealed at 420 °C for 8 h.

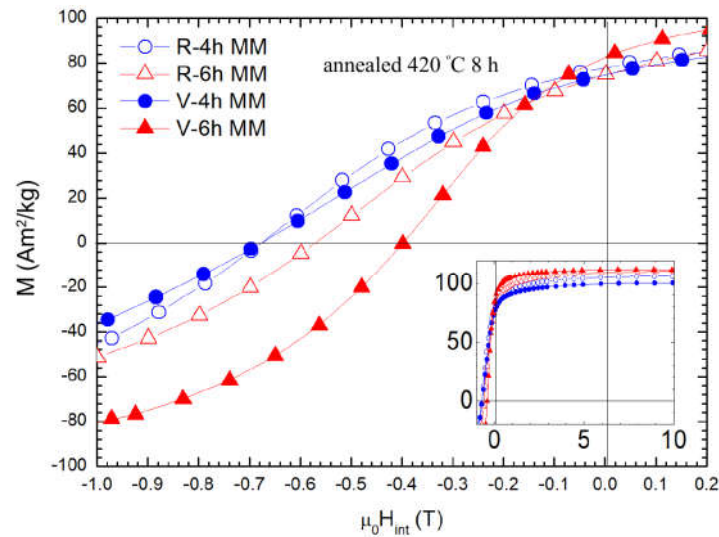

**Figure S2.** Demagnetization curves (recorded at 300 K) for SmCo<sub>5</sub> + 10 wt% Fe magnetic nanocomposite, made using virgin (V) or recycled (R) SmCo<sub>5</sub>, milled for 4 and 6 h and annealed at 420 °C for 8 h. Magnetization curves for the samples, up to 10 T, are given in figure inset.

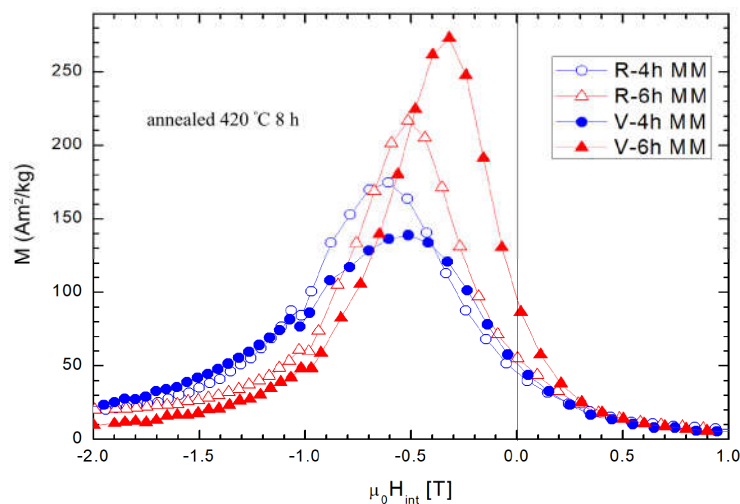

**Figure S3.**  $dM/dH$  vs  $H$  plots (recorded at 300 K) for SmCo<sub>5</sub> + 10 wt% Fe magnetic nanocomposite, made using virgin (V) or recycled (R) SmCo<sub>5</sub>, milled for 4 and 6 h and annealed at 420 °C for 8 h.

As seen in Figures 2,3 the magnetic properties of the nanocomposites annealed at 420 °C is much lower than that of the samples annealed at higher temperature (presented in manuscript). Mere strain removal is not enough to ensure good magnetic performance.

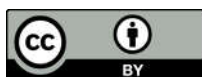

Supplement: Supplementary file 1 [file nanomaterials-10-01308-s001.pdf]
